# Supplementary material for: Interpretation Bias Across Body Dysmorphic, Social Anxiety and Generalized Anxiety Disorder—A Multilevel, Diffusion Model Account
Source: Springer Nature journal article supplement (doi:10.1007/s10608-020-10180-7), 2021-01-05
Supplement: MOESM1 [file 18737172]

**Appendix**

**Supplementary Table A1**
Sample SWAP stimuli per situation category

| Situation category | Situation | Positive interpretation | Negative interpretation |
| --- | --- | --- | --- |
| Appearance-related scenario | You see yourself in the mirror in the morning. | sleepy | horrible |
|  | You are lying on the beach in bathing clothes. | relaxation | stress |
|  | A friend is asking for a photo with you. | agree | reject |
| Social scenario | People laugh while you are giving a speech. | funny | stupid |
|  | Somebody is asking you for directions. | help | avoid |
|  | There is a moment of silence during a conversation. | natural | embarrassing |
| General scenario | Your new job has changed your life. | better | worse |
|  | Your partner is not home yet. | delayed | accident |
|  | You are thinking about your future. | enthusiastic | worried |
